# Supplementary material for: Relationship Between State-Level Google Online Search Volume and Cancer Incidence in the United States: Retrospective Study
Source: PubMed Central journal article supplement (PMC5778251; doi:10.2196/jmir.8870), 2018-01-08
Supplement: jmir_v20i1e6_app1.pdf [file jmir_v20i1e6_app1.pdf]

Multimedia Appendix 1. Average incidence per 100,000 people and average relative search volume (RSV) by state from 2004-2013

| State          | Breast Cancer |      | Prostate Cancer |      | Lung Cancer |      | Colon Cancer |      | Uterine Cancer |      | Leukemia |      |
|----------------|---------------|------|-----------------|------|-------------|------|--------------|------|----------------|------|----------|------|
|                | IR            | RSV  | IR              | RSV  | IR          | RSV  | IR           | RSV  | IR             | RSV  | IR       | RSV  |
| Alabama        | 118.3         | 70.7 | 149.5           | 71.5 | 73.9        | 64.4 | 47.3         | 77.3 | 18.4           | 50.5 | 11.8     | 73.7 |
| Alaska         | 126.9         | 62.2 | 123.1           | 67.0 | 69.0        | 55.8 | 47.6         | 68.9 | 24.0           | --   | 12.7     | 59.7 |
| Arizona        | 110.4         | 58.8 | 105.4           | 61.3 | 54.2        | 51.5 | 37.0         | 59.8 | 20.2           | 52.1 | 11.0     | 59.6 |
| Arkansas       | 110.6         | 66.7 | 143.3           | 75.1 | 79.5        | 65.9 | 45.8         | 77.9 | 19.8           | 58.8 | 11.5     | 71.0 |
| California     | 122.0         | 49.8 | 134.2           | 50.9 | 50.1        | 43.7 | 41.5         | 51.9 | 23.2           | 37.0 | 12.6     | 50.5 |
| Colorado       | 123.9         | 55.8 | 144.2           | 57.4 | 48.2        | 51.2 | 38.7         | 59.0 | 21.0           | 49.7 | 13.9     | 56.7 |
| Connecticut    | 136.8         | 70.7 | 147.2           | 67.4 | 65.5        | 68.1 | 44.6         | 66.6 | 29.1           | 66.1 | 14.1     | 70.5 |
| Delaware       | 128.1         | 95.7 | 167.8           | 83.6 | 76.2        | 85.6 | 44.6         | 78.1 | 28.3           | --   | 13.5     | 79.8 |
| D. of Columbia | 139.5         | 65.9 | 182.0           | 64.4 | 60.4        | 53.7 | 47.1         | 62.2 | 28.4           | 48.3 | 9.7      | 60.4 |
| Florida        | 115.4         | 58.9 | 126.0           | 61.1 | 66.7        | 53.2 | 42.1         | 59.9 | 22.1           | 46.1 | 13.2     | 57.1 |
| Georgia        | 122.5         | 65.2 | 155.3           | 59.7 | 70.5        | 55.8 | 44.8         | 64.2 | 19.8           | 46.9 | 12.8     | 60.3 |
| Hawaii         | 126.6         | 54.5 | 113.7           | 61.2 | 50.3        | 51.9 | 46.4         | 65.3 | 29.0           | --   | 11.3     | 57.9 |
| Idaho          | 117.9         | 55.5 | 151.4           | 65.3 | 54.4        | 49.9 | 39.8         | 65.9 | 23.4           | --   | 15.6     | 70.9 |
| Illinois       | 126.7         | 66.0 | 144.8           | 59.4 | 70.3        | 62.2 | 49.9         | 65.3 | 27.9           | 53.1 | 13.5     | 63.5 |
| Indiana        | 118.7         | 71.7 | 119.4           | 63.2 | 77.0        | 72.0 | 47.8         | 72.6 | 26.4           | 64.6 | 13.3     | 80.9 |
| Iowa           | 122.4         | 70.7 | 130.8           | 62.2 | 66.9        | 69.6 | 49.6         | 76.9 | 29.9           | 63.8 | 15.5     | 85.2 |
| Kansas         | 123.5         | 61.9 | 147.9           | 57.3 | 64.9        | 54.9 | 45.6         | 65.8 | 24.0           | 52.3 | 14.9     | 73.7 |
| Kentucky       | 121.5         | 70.7 | 130.2           | 66.6 | 99.0        | 84.0 | 53.8         | 80.4 | 24.3           | 60.9 | 14.6     | 75.8 |
| Louisiana      | 120.1         | 64.9 | 161.7           | 62.3 | 74.9        | 60.7 | 51.3         | 66.9 | 17.9           | 45.6 | 12.8     | 66.2 |
| Maine          | 127.3         | 72.3 | 135.5           | 68.8 | 77.2        | 74.4 | 45.9         | 73.5 | 30.7           | 78.5 | 15.9     | 72.8 |
| Maryland       | 127.8         | 75.8 | 147.4           | 77.6 | 63.6        | 67.9 | 41.6         | 72.0 | 24.4           | 56.8 | 11.7     | 74.1 |
| Massachusetts  | 135.4         | 70.1 | 145.6           | 64.7 | 69.4        | 64.7 | 44.1         | 61.8 | 29.8           | 58.0 | 12.9     | 67.1 |
| Michigan       | 122.6         | 66.1 | 154.7           | 61.1 | 71.1        | 62.5 | 43.9         | 62.2 | 28.4           | 58.4 | 14.0     | 68.0 |
| Minnesota      | 128.4         | 65.5 | 157.2           | 63.2 | 56.4        | 63.3 | 43.3         | 70.7 | 28.3           | 57.2 | 16.0     | 69.7 |
| Mississippi    | 114.4         | 73.3 | 158.0           | 69.4 | 78.8        | 69.8 | 51.8         | 75.5 | 19.4           | 50.0 | 11.9     | 76.6 |
| Missouri       | 123.5         | 64.4 | 120.8           | 60.1 | 78.2        | 62.4 | 47.1         | 67.7 | 25.2           | 53.2 | 13.1     | 71.5 |
| Montana        | 122.6         | 61.6 | 149.0           | 80.8 | 61.8        | 59.6 | 43.2         | 66.2 | 24.8           | --   | 15.2     | 74.7 |
| Nebraska       | 122.9         | 68.7 | 138.4           | 62.3 | 61.8        | 68.8 | 49.6         | 78.1 | 26.4           | 55.2 | 14.3     | 78.8 |
| Nevada         | 78.4          | 50.3 | 95.2            | 56.9 | 48.8        | 48.7 | 31.7         | 54.3 | 12.8           | 36.2 | 9.6      | 54.1 |
| New Hampshire  | 135.9         | 74.0 | 147.3           | 66.2 | 70.4        | 70.7 | 43.2         | 66.4 | 31.3           | 73.3 | 14.4     | 65.3 |
| New Jersey     | 130.8         | 68.4 | 160.9           | 66.3 | 62.1        | 62.5 | 47.5         | 64.3 | 30.1           | 59.0 | 14.3     | 63.0 |
| New Mexico     | 111.5         | 69.5 | 122.6           | 77.2 | 44.5        | 54.7 | 38.1         | 68.1 | 21.6           | 53.0 | 13.0     | 72.6 |
| New York       | 127.5         | 64.0 | 158.3           | 59.6 | 63.5        | 59.5 | 45.6         | 60.7 | 30.0           | 51.1 | 15.1     | 62.0 |
| North Carolina | 126.4         | 68.4 | 146.5           | 68.2 | 73.5        | 65.6 | 42.8         | 69.2 | 22.8           | 54.6 | 12.9     | 69.9 |
| North Dakota   | 123.2         | 78.5 | 149.7           | 70.0 | 56.9        | 79.0 | 50.4         | 92.7 | 25.2           | --   | 15.8     | 81.8 |
| Ohio           | 122.1         | 66.7 | 134.2           | 59.9 | 73.4        | 65.5 | 46.3         | 66.6 | 27.8           | 66.9 | 12.0     | 74.0 |
| Oklahoma       | 121.6         | 59.5 | 136.3           | 63.3 | 76.5        | 53.9 | 46.4         | 69.8 | 20.7           | 53.7 | 14.3     | 62.9 |
| Oregon         | 129.6         | 51.1 | 130.7           | 59.8 | 63.4        | 48.4 | 40.7         | 55.8 | 25.6           | 52.6 | 12.1     | 57.8 |
| Pennsylvania   | 127.2         | 72.8 | 141.5           | 67.6 | 68.4        | 69.7 | 48.6         | 68.8 | 31.2           | 66.7 | 14.0     | 76.7 |
| Rhode Island   | 131.8         | 75.4 | 137.9           | 59.4 | 72.1        | 72.4 | 44.8         | 69.4 | 30.8           | 50.6 | 14.1     | 76.7 |
| South Carolina | 123.9         | 68.4 | 150.4           | 73.1 | 71.5        | 70.2 | 44.2         | 77.2 | 21.1           | 48.4 | 12.9     | 71.1 |
| South Dakota   | 125.3         | 83.6 | 142.3           | 79.8 | 59.4        | 78.9 | 47.2         | 78.8 | 26.5           | 85.7 | 13.9     | 85.8 |
| Tennessee      | 120.1         | 69.1 | 135.2           | 70.1 | 79.3        | 66.7 | 45.5         | 79.8 | 20.7           | 63.4 | 13.0     | 73.2 |
| Texas          | 113.7         | 56.0 | 127.7           | 53.8 | 61.1        | 47.7 | 42.7         | 59.6 | 19.8           | 43.1 | 13.9     | 60.6 |
| Utah           | 112.6         | 47.9 | 164.2           | 56.2 | 28.9        | 38.8 | 34.9         | 61.0 | 24.0           | 51.3 | 13.7     | 61.0 |
| Vermont        | 129.1         | 72.8 | 132.9           | 73.1 | 69.2        | 69.0 | 41.2         | 78.7 | 32.2           | --   | 13.3     | 69.7 |
| Virginia       | 125.1         | 54.4 | 138.6           | 51.4 | 65.5        | 48.8 | 41.5         | 59.7 | 23.1           | 42.7 | 11.0     | 52.5 |
| Washington     | 133.0         | 55.2 | 144.4           | 57.1 | 63.1        | 47.7 | 40.7         | 57.8 | 25.1           | 49.2 | 14.8     | 58.5 |
| West Virginia  | 113.6         | 86.4 | 122.9           | 79.3 | 85.9        | 90.5 | 51.0         | 92.6 | 29.7           | 71.2 | 14.2     | 86.4 |
| Wisconsin      | 125.7         | 67.3 | 139.8           | 62.7 | 62.6        | 64.9 | 42.8         | 64.3 | 28.8           | 63.2 | 16.5     | 74.4 |
| Wyoming        | 111.2         | 75.0 | 139.3           | 60.0 | 49.9        | 61.9 | 40.9         | 72.4 | 20.9           | --   | 12.0     | 75.0 |
| First Quartile | 119.4         | 60.6 | 131.9           | 59.9 | 60.8        | 53.8 | 41.9         | 62.2 | 21.3           | 49.9 | 12.6     | 60.8 |
| Median         | 123.5         | 66.7 | 142.3           | 63.2 | 66.7        | 62.5 | 44.8         | 66.9 | 25.1           | 53.2 | 13.5     | 70.5 |
| Third Quartile | 127.4         | 71.2 | 149.6           | 69.1 | 73.5        | 69.3 | 47.3         | 74.5 | 28.6           | 62.1 | 14.3     | 74.6 |

IR incidence rate per 100,000 people; RSV relative search volume
